# Supplementary material for: Thermodynamic insight into the growth of calcia inclusions at the nanoscale: the case of Fe–O–Ca melt
Source: Royal Society of Chemistry journal article supplement (doi:10.1039/c9ra01337g), 2019-01-01
Supplement: c9ra01337g1.pdf [file c9ra01337g1.pdf]

## Supplementary information

Table S1 The enthalpy ( $H$ ) for  $(\text{CaO})_4$ ,  $\text{CaO}(\text{bulk})$  and nano- $\text{CaO}$

| T    | $(1/4)(\text{CaO})_4$ | 2 nm   | 3 nm   | 4 nm   | 5 nm   | 6 nm   | 7 nm   | 8 nm   | 9 nm                      |
|------|-----------------------|--------|--------|--------|--------|--------|--------|--------|---------------------------|
| 1000 | 46.669                | 47.271 | 48.050 | 48.589 | 48.961 | 49.228 | 49.429 | 49.584 | 49.708                    |
| 1100 | 51.158                | 51.817 | 52.672 | 53.263 | 53.671 | 53.964 | 54.184 | 54.354 | 54.490                    |
| 1200 | 55.660                | 56.378 | 57.308 | 57.952 | 58.395 | 58.715 | 58.954 | 59.139 | 59.287                    |
| 1300 | 60.173                | 60.950 | 61.955 | 62.651 | 63.131 | 63.477 | 63.736 | 63.936 | 64.096                    |
| 1400 | 64.694                | 65.529 | 66.610 | 67.359 | 67.876 | 68.247 | 68.526 | 68.741 | 68.913                    |
| 1500 | 69.223                | 70.117 | 71.274 | 72.075 | 72.628 | 73.025 | 73.323 | 73.554 | 73.738                    |
| 1600 | 73.757                | 74.709 | 75.942 | 76.796 | 77.385 | 77.809 | 78.126 | 78.372 | 78.568                    |
| 1700 | 78.295                | 79.306 | 80.615 | 81.522 | 82.147 | 82.597 | 82.934 | 83.195 | 83.403                    |
| 1800 | 82.837                | 83.907 | 85.292 | 86.252 | 86.913 | 87.389 | 87.746 | 88.022 | 88.242                    |
| 1873 | 86.473                | 87.590 | 89.036 | 90.038 | 90.728 | 91.225 | 91.598 | 91.886 | 92.116                    |
| 1900 | 87.383                | 88.512 | 89.973 | 90.985 | 91.683 | 92.185 | 92.562 | 92.853 | 93.085                    |
| 2000 | 91.931                | 93.119 | 94.656 | 95.721 | 96.455 | 96.984 | 97.380 | 97.686 | 97.930                    |
|      | 10nm                  | 15 nm  | 20 nm  | 30 nm  | 40 nm  | 50 nm  | 100 nm | 200 nm | $\text{CaO}(\text{bulk})$ |
| 1000 | 49.809                | 50.120 | 50.281 | 50.444 | 50.527 | 50.578 | 50.679 | 50.730 | 50.781                    |
| 1100 | 54.601                | 54.942 | 55.118 | 55.298 | 55.389 | 55.444 | 55.555 | 55.611 | 55.667                    |
| 1200 | 59.407                | 59.779 | 59.971 | 60.166 | 60.265 | 60.325 | 60.446 | 60.507 | 60.568                    |
| 1300 | 64.226                | 64.628 | 64.835 | 65.046 | 65.154 | 65.218 | 65.349 | 65.415 | 65.481                    |
| 1400 | 69.053                | 69.485 | 69.708 | 69.935 | 70.051 | 70.120 | 70.261 | 70.331 | 70.403                    |
| 1500 | 73.887                | 74.350 | 74.588 | 74.832 | 74.955 | 75.029 | 75.180 | 75.256 | 75.332                    |

|      |        |        |        |        |        |        |        |        |         |
|------|--------|--------|--------|--------|--------|--------|--------|--------|---------|
| 1600 | 78.727 | 79.220 | 79.475 | 79.734 | 79.865 | 79.945 | 80.105 | 80.186 | 80.267  |
| 1700 | 83.572 | 84.096 | 84.366 | 84.641 | 84.781 | 84.865 | 85.035 | 85.121 | 85.207  |
| 1800 | 88.421 | 88.975 | 89.261 | 89.552 | 89.700 | 89.789 | 89.969 | 90.060 | 90.151  |
| 1873 | 92.303 | 92.881 | 93.180 | 93.483 | 93.638 | 93.731 | 93.919 | 94.013 | 94.109  |
| 1900 | 93.274 | 93.858 | 94.160 | 94.467 | 94.623 | 94.717 | 94.906 | 95.002 | 95.099  |
| 2000 | 98.129 | 98.744 | 99.061 | 99.384 | 99.548 | 99.647 | 99.847 | 99.948 | 100.049 |

Table S2 The entropy (S) for (CaO)<sub>4</sub>, CaO(bulk) and nano-CaO

| T    | (1/4)(CaO) <sub>4</sub> | 2 nm    | 3 nm    | 4 nm    | 5 nm    | 6 nm    | 7 nm    | 8 nm    | 9 nm      |
|------|-------------------------|---------|---------|---------|---------|---------|---------|---------|-----------|
| 1000 | 148.768                 | 140.355 | 129.464 | 121.920 | 116.721 | 112.978 | 110.171 | 108.003 | 106.273   |
| 1100 | 156.964                 | 148.657 | 137.903 | 130.454 | 125.321 | 121.625 | 118.854 | 116.713 | 115.004   |
| 1200 | 160.576                 | 152.316 | 141.623 | 134.215 | 129.111 | 125.436 | 122.681 | 120.552 | 118.853   |
| 1300 | 163.927                 | 155.710 | 145.073 | 137.705 | 132.628 | 128.972 | 126.231 | 124.114 | 122.423   |
| 1400 | 167.051                 | 158.875 | 148.291 | 140.958 | 135.906 | 132.268 | 129.541 | 127.434 | 125.752   |
| 1500 | 169.977                 | 161.839 | 151.303 | 144.005 | 138.976 | 135.355 | 132.640 | 130.543 | 128.869   |
| 1600 | 172.728                 | 164.626 | 154.136 | 146.870 | 141.863 | 138.258 | 135.555 | 133.467 | 131.800   |
| 1700 | 175.324                 | 167.255 | 156.809 | 149.573 | 144.587 | 140.997 | 138.306 | 136.226 | 134.566   |
| 1800 | 177.301                 | 169.258 | 158.845 | 151.632 | 146.662 | 143.082 | 140.400 | 138.327 | 136.672   |
| 1873 | 177.782                 | 169.745 | 159.340 | 152.133 | 147.166 | 143.590 | 140.909 | 138.838 | 137.185   |
| 1900 | 180.115                 | 172.108 | 161.742 | 154.562 | 149.614 | 146.051 | 143.381 | 141.317 | 139.670   |
| 2000 | 148.768                 | 140.355 | 129.464 | 121.920 | 116.721 | 112.978 | 110.171 | 108.003 | 106.273   |
|      | 10nm                    | 15 nm   | 20 nm   | 30 nm   | 40 nm   | 50 nm   | 100 nm  | 200 nm  | CaO(bulk) |
| 1000 | 104.864                 | 100.511 | 98.262  | 95.973  | 94.812  | 94.110  | 92.696  | 91.983  | 91.264    |
| 1100 | 113.613                 | 109.315 | 107.095 | 104.835 | 103.688 | 102.996 | 101.599 | 100.895 | 100.185   |
| 1200 | 117.470                 | 113.196 | 110.988 | 108.741 | 107.601 | 106.912 | 105.523 | 104.823 | 104.117   |

|      |         |         |         |         |         |         |         |         |         |
|------|---------|---------|---------|---------|---------|---------|---------|---------|---------|
| 1300 | 121.047 | 116.796 | 114.600 | 112.364 | 111.230 | 110.545 | 109.163 | 108.467 | 107.765 |
| 1400 | 124.382 | 120.152 | 117.967 | 115.743 | 114.614 | 113.932 | 112.557 | 111.864 | 111.165 |
| 1500 | 127.506 | 123.295 | 121.120 | 118.906 | 117.783 | 117.104 | 115.736 | 115.046 | 114.350 |
| 1600 | 130.443 | 126.251 | 124.085 | 121.881 | 120.762 | 120.087 | 118.724 | 118.038 | 117.345 |
| 1700 | 133.215 | 129.040 | 126.883 | 124.688 | 123.574 | 122.901 | 121.545 | 120.861 | 120.171 |
| 1800 | 135.325 | 131.163 | 129.013 | 126.825 | 125.715 | 125.044 | 123.692 | 123.010 | 122.323 |
| 1873 | 135.839 | 131.680 | 129.532 | 127.346 | 126.236 | 125.566 | 124.214 | 123.533 | 122.846 |
| 1900 | 138.329 | 134.186 | 132.046 | 129.868 | 128.762 | 128.095 | 126.748 | 126.070 | 125.385 |
| 2000 | 104.864 | 100.511 | 98.262  | 95.973  | 94.812  | 94.110  | 92.696  | 91.983  | 91.264  |

Table S3 The Gibbs free energy (G) for (CaO)<sub>4</sub>, CaO(bulk) and nano-CaO

| T    | (1/4)(CaO) <sub>4</sub> | 2 nm         | 3 nm         | 4 nm         | 5 nm         | 6 nm         | 7 nm         | 8 nm         | 9 nm         |
|------|-------------------------|--------------|--------------|--------------|--------------|--------------|--------------|--------------|--------------|
| 1000 | -1976218.206            | -1976258.794 | -1976311.340 | -1976347.739 | -1976372.819 | -1976390.879 | -1976404.418 | -1976414.877 | -1976423.228 |
| 1100 | -1976233.300            | -1976273.050 | -1976324.510 | -1976360.157 | -1976384.719 | -1976402.406 | -1976415.665 | -1976425.908 | -1976434.086 |
| 1200 | -1976248.804            | -1976287.720 | -1976338.102 | -1976373.001 | -1976397.048 | -1976414.365 | -1976427.346 | -1976437.375 | -1976445.381 |
| 1300 | -1976264.683            | -1976302.771 | -1976352.080 | -1976386.237 | -1976409.772 | -1976426.721 | -1976439.425 | -1976449.240 | -1976457.077 |
| 1400 | -1976280.910            | -1976318.174 | -1976366.417 | -1976399.835 | -1976422.861 | -1976439.443 | -1976451.873 | -1976461.476 | -1976469.142 |
| 1500 | -1976297.461            | -1976333.905 | -1976381.087 | -1976413.770 | -1976436.290 | -1976452.507 | -1976464.663 | -1976474.055 | -1976481.553 |
| 1600 | -1976314.314            | -1976349.943 | -1976396.068 | -1976428.020 | -1976450.036 | -1976465.890 | -1976477.774 | -1976486.956 | -1976494.286 |
| 1700 | -1976331.450            | -1976366.267 | -1976411.342 | -1976442.565 | -1976464.079 | -1976479.572 | -1976491.185 | -1976500.157 | -1976507.321 |
| 1800 | -1976348.855            | -1976382.863 | -1976426.891 | -1976457.389 | -1976478.403 | -1976493.536 | -1976504.880 | -1976513.644 | -1976520.641 |
| 1873 | -1976362.960            | -1976396.324 | -1976439.517 | -1976469.438 | -1976490.054 | -1976504.900 | -1976516.029 | -1976524.626 | -1976531.491 |
| 1900 | -1976366.511            | -1976399.714 | -1976442.699 | -1976472.475 | -1976492.992 | -1976507.767 | -1976518.842 | -1976527.398 | -1976534.229 |
| 2000 | -1976384.406            | -1976416.807 | -1976458.754 | -1976487.811 | -1976507.832 | -1976522.249 | -1976533.057 | -1976541.407 | -1976548.073 |
|      | 10nm                    | 15 nm        | 20 nm        | 30 nm        | 40 nm        | 50 nm        | 100 nm       | 200 nm       | CaO(bulk)    |

---

|      |              |              |              |              |              |              |              |              |              |
|------|--------------|--------------|--------------|--------------|--------------|--------------|--------------|--------------|--------------|
| 1000 | -1976430.025 | -1976451.026 | -1976461.874 | -1976472.916 | -1976478.520 | -1976481.905 | -1976488.729 | -1976492.170 | -1976495.637 |
| 1100 | -1976440.743 | -1976461.311 | -1976471.934 | -1976482.748 | -1976488.236 | -1976491.551 | -1976498.235 | -1976501.604 | -1976505.000 |
| 1200 | -1976451.898 | -1976472.035 | -1976482.436 | -1976493.023 | -1976498.396 | -1976501.641 | -1976508.185 | -1976511.483 | -1976514.809 |
| 1300 | -1976463.455 | -1976483.163 | -1976493.342 | -1976503.704 | -1976508.963 | -1976512.139 | -1976518.544 | -1976521.772 | -1976525.026 |
| 1400 | -1976475.383 | -1976494.665 | -1976504.624 | -1976514.762 | -1976519.907 | -1976523.014 | -1976529.280 | -1976532.439 | -1976535.623 |
| 1500 | -1976487.656 | -1976506.514 | -1976516.254 | -1976526.169 | -1976531.201 | -1976534.240 | -1976540.368 | -1976543.457 | -1976546.571 |
| 1600 | -1976500.253 | -1976518.688 | -1976528.210 | -1976537.903 | -1976542.822 | -1976545.793 | -1976551.784 | -1976554.804 | -1976557.848 |
| 1700 | -1976513.151 | -1976531.167 | -1976540.472 | -1976549.944 | -1976554.751 | -1976557.654 | -1976563.509 | -1976566.460 | -1976569.435 |
| 1800 | -1976526.336 | -1976543.933 | -1976553.022 | -1976562.274 | -1976566.969 | -1976569.805 | -1976575.524 | -1976578.406 | -1976581.312 |
| 1873 | -1976537.078 | -1976554.341 | -1976563.258 | -1976572.335 | -1976576.941 | -1976579.724 | -1976585.334 | -1976588.162 | -1976591.012 |
| 1900 | -1976539.790 | -1976556.970 | -1976565.844 | -1976574.877 | -1976579.461 | -1976582.230 | -1976587.813 | -1976590.627 | -1976593.464 |
| 2000 | -1976553.499 | -1976570.264 | -1976578.924 | -1976587.738 | -1976592.212 | -1976594.914 | -1976600.362 | -1976603.108 | -1976605.877 |

---
